# Supplementary material for: Infrared spectroscopy from electrostatic embedding QM/MM: local normal mode analysis of infrared spectra of arabidopsis thaliana plant cryptochrome
Source: Royal Society of Chemistry journal article supplement (doi:10.1039/d0cp06070d), 2020-12-15
Supplement: d0cp06070d1.pdf [file d0cp06070d1.pdf]

# Supporting Information: Infrared spectroscopy from electrostatic embedding QM/MM: local normal mode analysis of blue-light-induced infrared spectra of arabidopsis thaliana plant cryptochrome<sup>†</sup>

Miquel Huix-Rotllant<sup>\*a</sup>, Karno Schwinn<sup>a</sup> and Nicolas Ferré<sup>a</sup>

## 1 Theoretical Infrared spectrum of FAD embedded in cryptochrome

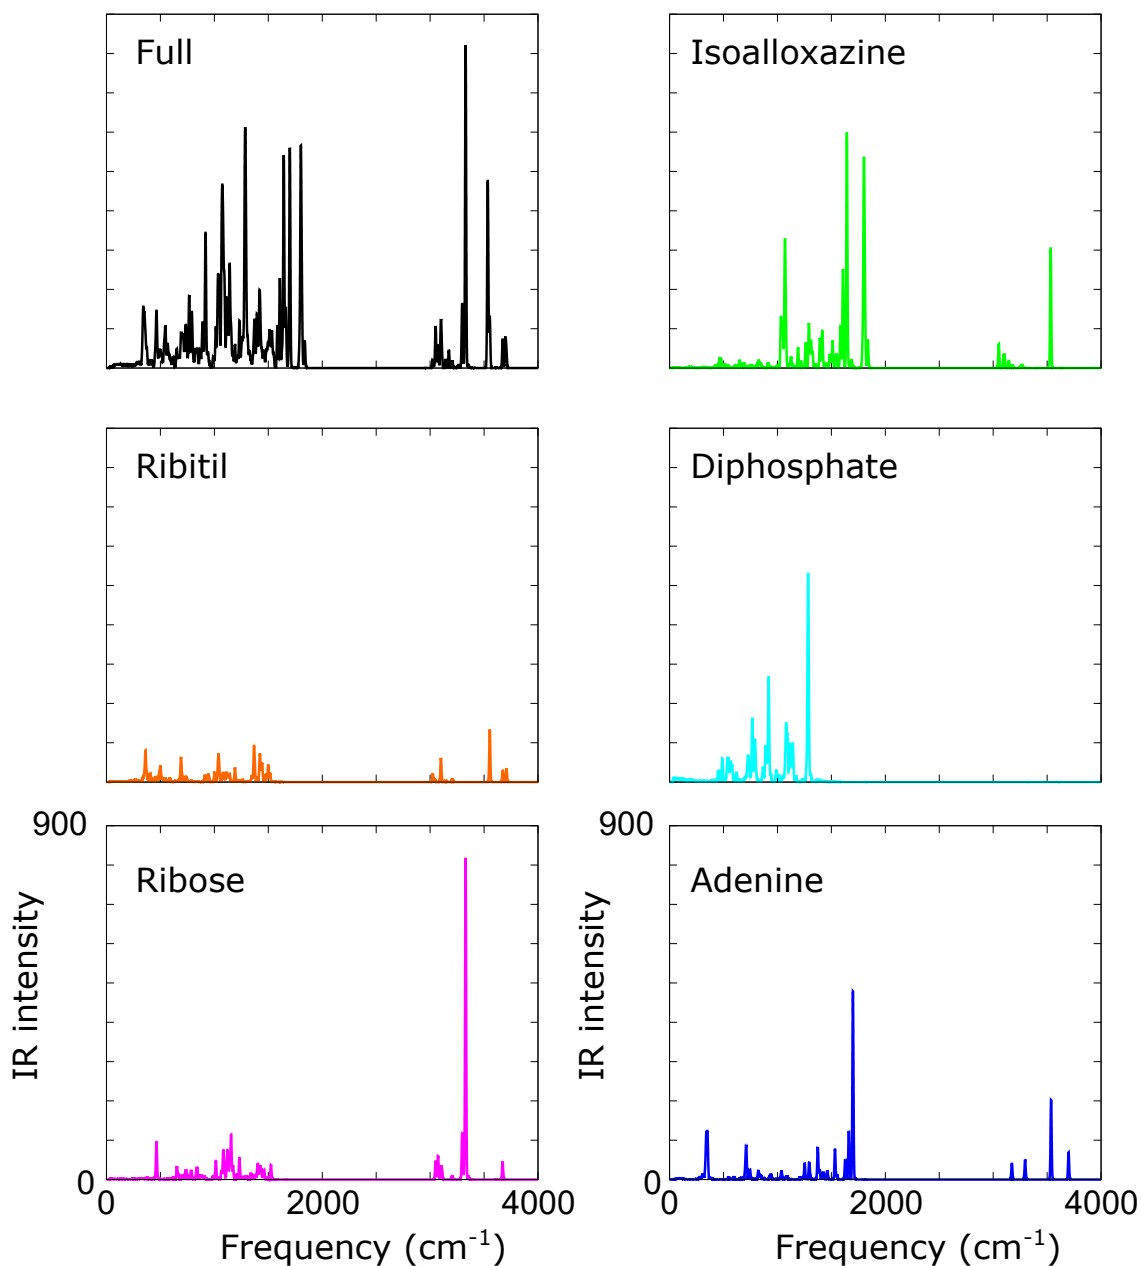

Fig. 1 Full range IR theoretical spectrum of FAD embedded in cryptochrome protein decomposed in fragments.

<sup>a</sup>Aix-Marseille Univ, CNRS, ICR, Marseille, France. E-mail: miquel.huixrotllant@univ-amu.fr

## 2 Theoretical Infrared spectrum of FAD<sup>•-</sup> embedded in cryptochrome

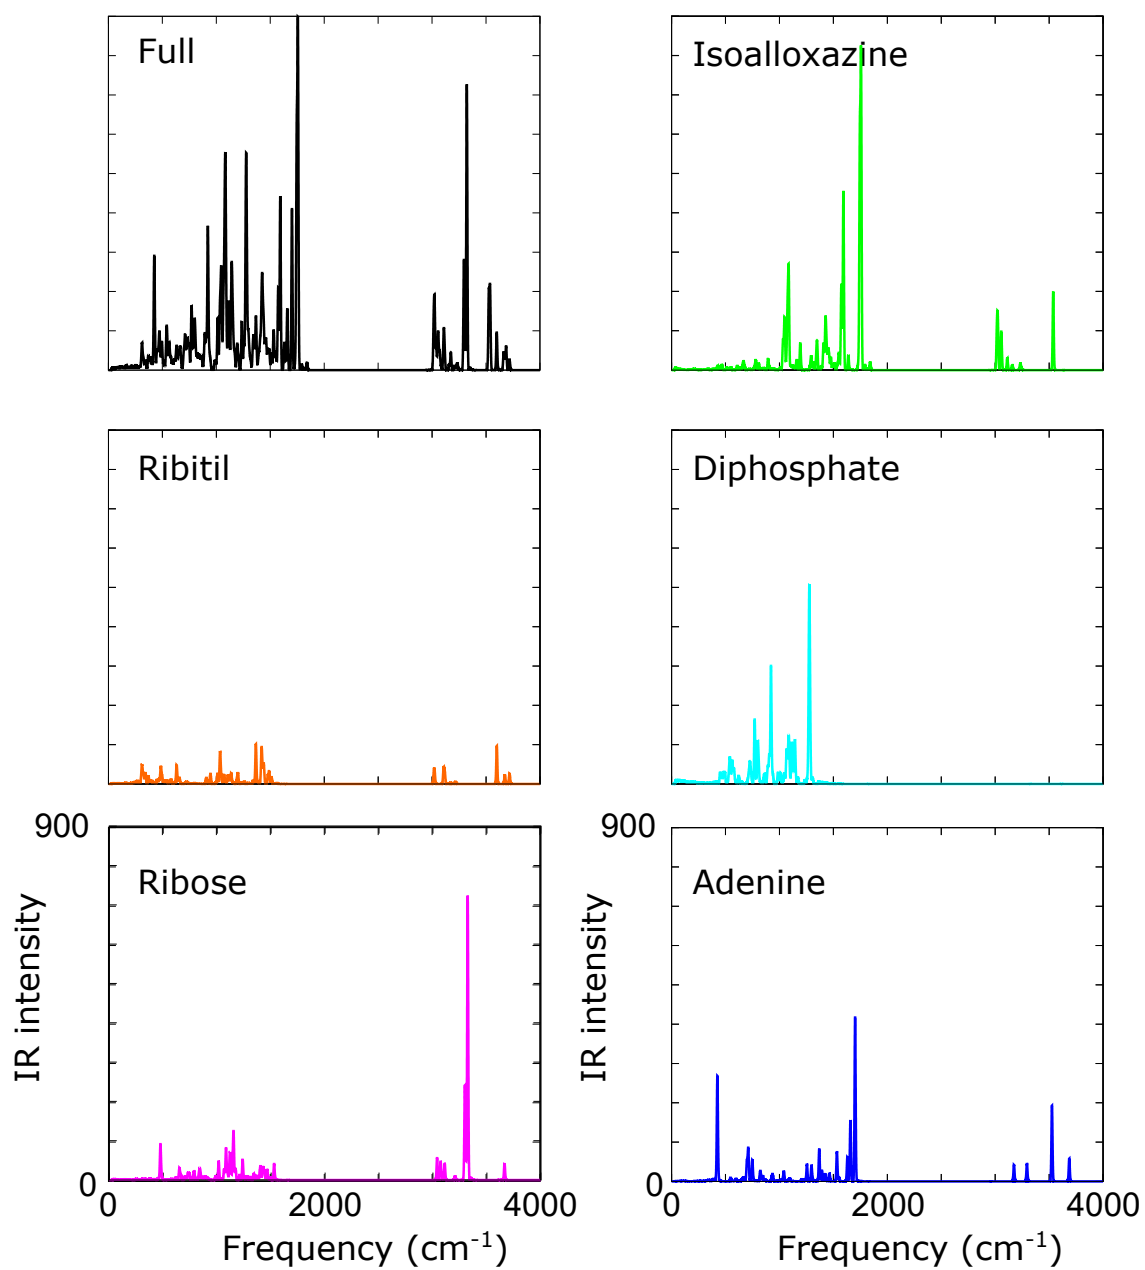

Fig. 2 Full range IR theoretical spectrum of FAD<sup>•-</sup> embedded in cryptochrome protein decomposed in fragments.

### 3 Theoretical Infrared spectrum of FADH<sup>•</sup> embedded in cryptochrome

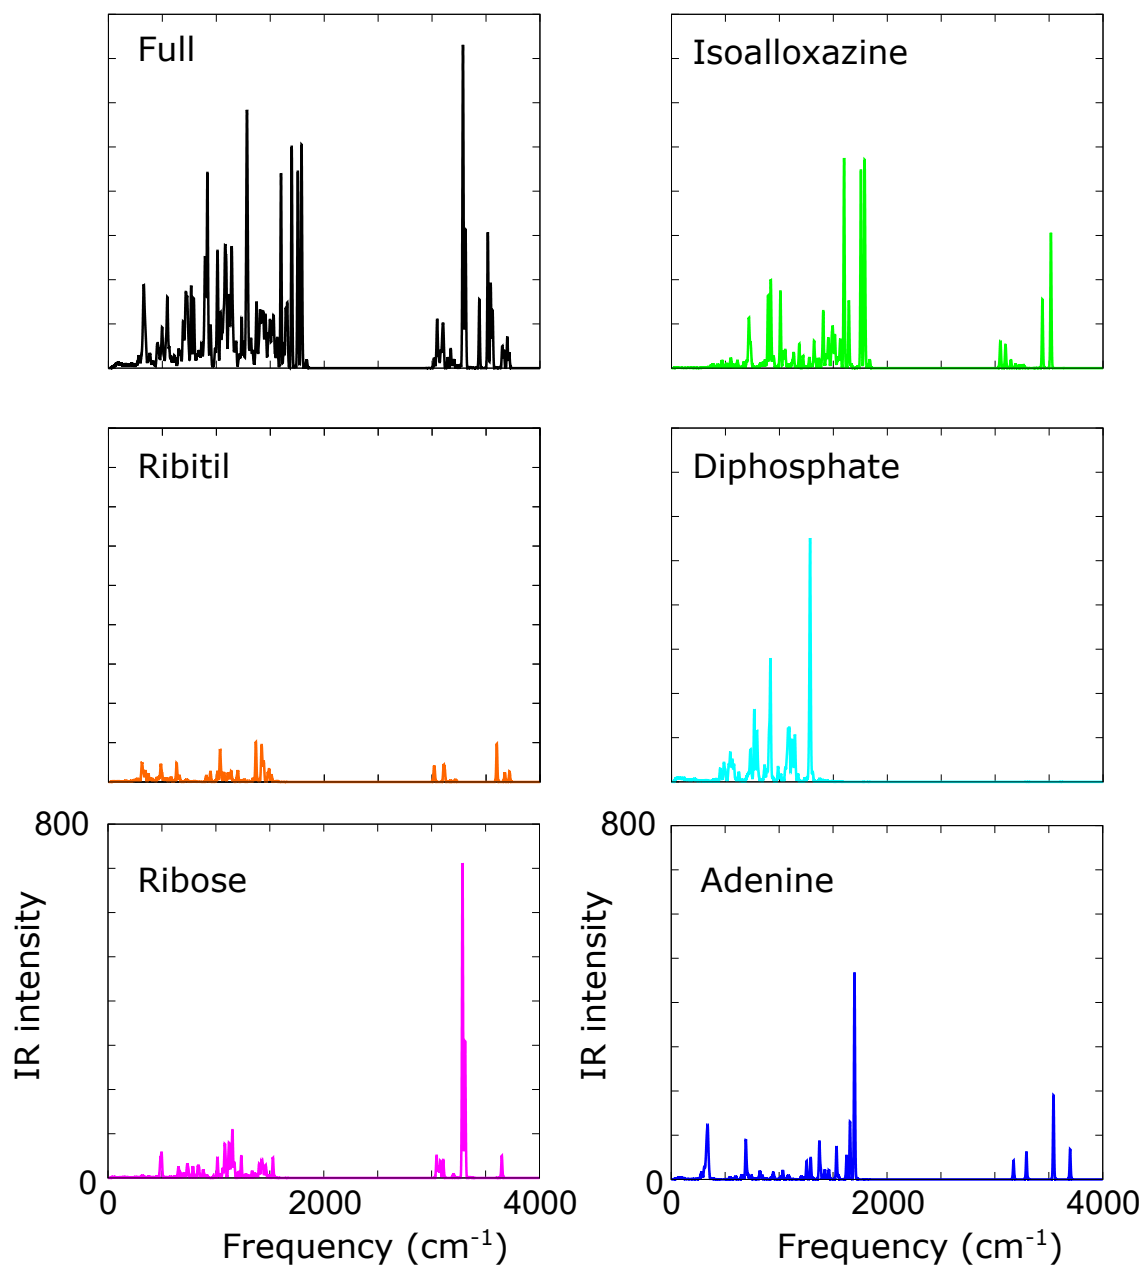

Fig. 3 Full range IR theoretical spectrum of FADH<sup>•</sup> embedded in cryptochrome protein decomposed in fragments.

#### 4 Theoretical Infrared spectrum of FADH<sup>-</sup> embedded in cryptochrome

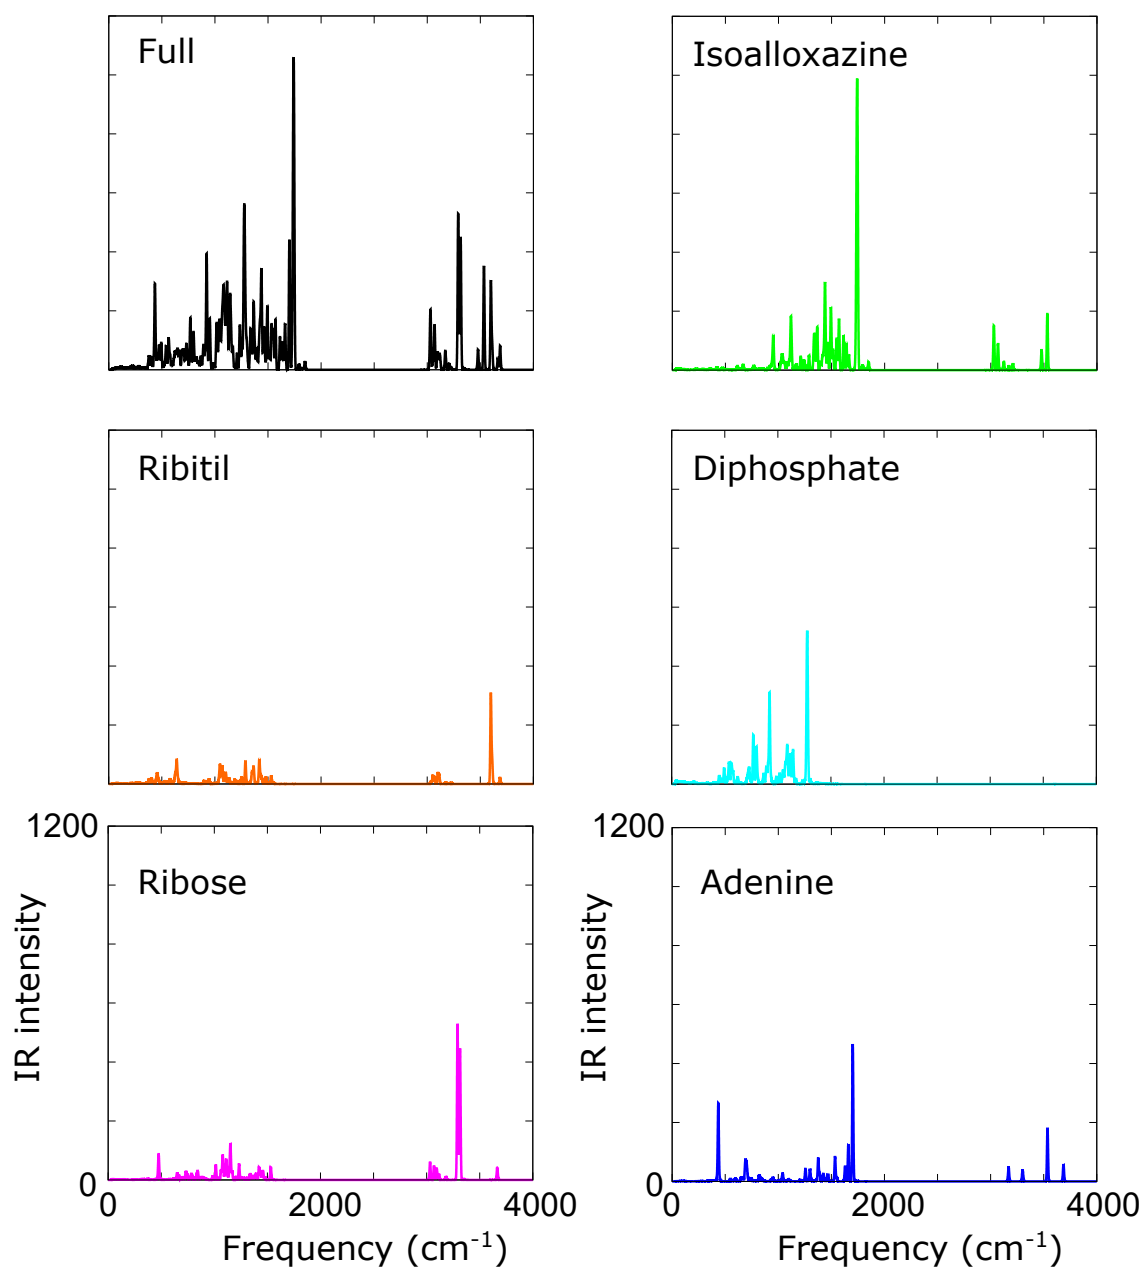

Fig. 4 Full range IR theoretical spectrum of FADH<sup>-</sup> embedded in cryptochrome protein decomposed in fragments.
